# Supplementary material
Source: publisher figshare collection journal article supplement (https://karger.figshare.com/ndownloader/files/35906840)
Supplement: Supplementary file 1 [file 35906840]

**SURVEY ABOUT CMV AWARENESS AMONG HEALTH CARE PROFESSIONALS**

#
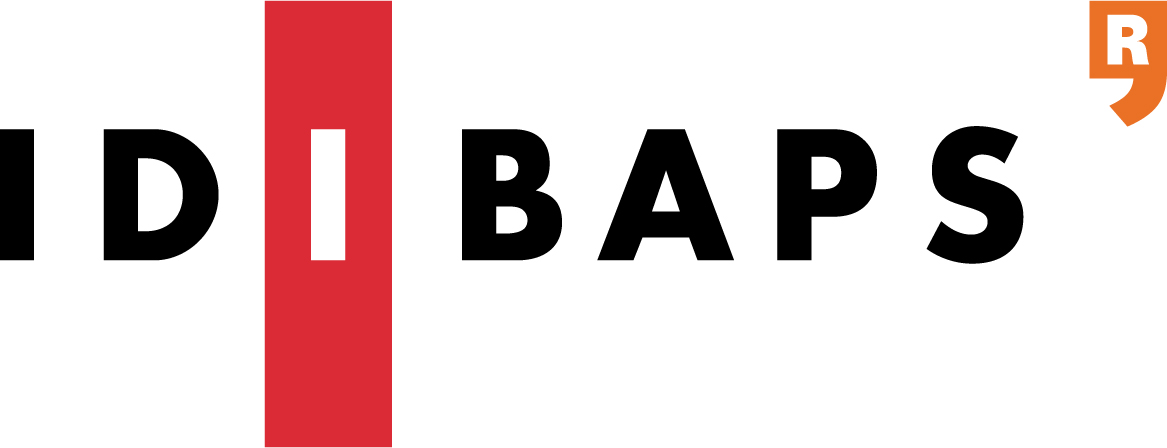


1. **Do you consider that congenital CMV infection is a relevant problem in our setting?**
2. Yes
3. No

2. **How can CMV infection be transmitted? Multiple answers may be valid.**

a) Airborne

b) Sexual intercourse

c) Contact with skin

d) Contact with saliva

e) Diaper change (young children)

f) By infected food

g) I do not know

3. **What are the clinical manifestations of a mother during CMV infection? Multiple answers may be valid**.

a) Asymptomatic

b) Fever

c) Heart problems

d) Pseudo-flu syndrome

e) Thrombosis

f) Increased liver enzymes

g) I do not know

4. **What are the clinical manifestations of a newborn with congenital CMV infection? Multiple answers may be valid.**

a) Asymptomatic

b) Petechiae

c) Increased liver enzymes

d) Congenital heart disease

e) Microcephaly

f) Macrosomia

g) Seizures

h) Anal atresia

i) Hearing loss

j) Jaundice

k) Clubfoot

l) I do not know

5. **What are the possible long-term effects of congenital CMV infection?**

**Multiple answers may be valid**.

a) Hearing loss

b) Cognitive impairment

c) Heart diseases

d) Vision problems

e) Seizures

f) Obesity

g) Increased risk of developing neoplasms

h) Motor delay

i) I do not know

6. **In your opinion: Can reinfection / reactivation by CMV cause a fetal infection?**

a) Yes

b) No

c) I do not know

7. **At least half of pregnant women in our environment have had a primary infection before pregnancy**.

a) Yes

b) No

c) I do not know

8. **Are there currently in utero treatments for CMV-infected fetuses that have been proven effective?**

a) Yes

b) No

c) I do not know

9. **Is routine screening for CMV infection indicated during pregnancy?**

a) Yes

b) No

c) I do not know

10. **Are there preventive hygiene measures for CMV infection?**

a) Yes

b) No

c) I do not know

11. **If the answer is yes: what are these measures? Multiple answers may be valid.**

a) Wash hands with soap and water after changing baby's diaper

b) Avoid giving kisses on the mouth or near the mouth to children under 3 to 4 years old

c) Avoid sharing spoons with children under 3-4 years old.

d) Avoid consuming dairy products

e) Use gloves to clean cat litter boxes

f) When you are immune you do not need to apply these preventive measures

g) I do not know

12**. Do you think these hygiene measures are effective?**

a) Yes

b) No

c) I do not know

13. **Do you know the risks of vertical transmission, in case of maternal infection during pregnancy?**

a) Yes

b) No

c) I do not know

14. **If the answer is Yes: what is the transmission rate in the first trimester?**

a) 5%

b) 30%

c) 50%

d) 70%

15. **In case of fetal infection: What is the risk of severe lesions?**

a) 5%

b) 10%

c) 40%

d) I do not know

16. **In your opinion: Does the severity of fetal CMV infection vary according to the trimester of gestation in which the maternal infection occurred?**

a) Yes

b) No

c) I do not know

17. **Do you give information to pregnant women about CMV infection?**

a) Yes

b) No

18. **If the answer is No: What is the reason for not doing so? Multiple answers may be valid.**

a) I do not have enough time

b) Lack of information

c) It is a rare virus

d) I often forget

e) It is not recommended in clinical guidelines

f) It is not part of my activities

19. **If the answer is Yes: When do you give information?**

a) Pre-pregnancy

b) First trimester

c) Second trimester

d) Third trimester

e) On the first prenatal visit

20. **Do you think there is little information on fetal CMV infection among health care professionals?**

a) Yes

b) No

21. **What is your profession?**

a) Nurse / Midwife

b) OB/GYN

**Supplementary material 1.-** Twenty item survey designed to evaluate knowledge about CMV infection among health professionals involved in prenatal care in Catalonia. **Correct answers are underlined.*

**REFERENCES:**

1. Centers for Disease Control and Prevention (CDC). Knowledge and practices of obstetricians and gynecologists regarding cytomegalovirus infection during pregnancy--United States, 2007. MMWR Morbidity and mortality weekly report [Internet]. 2008;57(3):65–8. Available from: <http://www.ncbi.nlm.nih.gov/pubmed/18219267>.
2. Cannon MJ, Schmid DS, Hyde TB. Review of cytomegalovirus seroprevalence and demographic characteristics associated with infection. Vol. 20, Reviews in Medical Virology. 2010. p. 202–13.
3. Leruez-Ville M, Ville Y. Fetal cytomegalovirus infection. Best Practice and Research: Clinical Obstetrics and Gynaecology [Internet]. 2017;38:97–107. Available from: <http://dx.doi.org/10.1016/j.bpobgyn.2016.10.005>
4. Chatzakis C, Ville Y, Makrydimas G, Dinas K, Zavlanos A, Sotiriadis A. Timing of primary maternal cytomegalovirus infection and rates of vertical transmission and fetal consequences. American Journal of Obstetrics and Gynecology [Internet]. 2020;223(6):870-883.e11. Available from: <http://dx.doi.org/10.1016/j.ajog.2020.05.038>.
5. Rawlinson WD, Boppana SB, Fowler KB, Kimberlin DW, Lazzarotto T, Alain S, et al. Congenital cytomegalovirus infection in pregnancy and the neonate: consensus recommendations for prevention, diagnosis, and therapy. Vol. 17, The Lancet Infectious Diseases. Lancet Publishing Group; 2017. p. e177–88
